# Supplementary material for: The Elovl4 Spinocerebellar Ataxia-34 Mutation 736T>G (p.W246G) Impairs Retinal Function in the Absence of Photoreceptor Degeneration
Source: PubMed Central journal article supplement (PMC7515967; doi:10.1007/s12035-020-02052-8), 2020-08-11
Supplement: 12035_2020_2052_MOESM8_ESM.pdf [file 12035_2020_2052_MOESM8_ESM.pdf]

**Supplemental Table 1. Polyunsaturated fatty acids in retinal phosphatidylcholine (PC)**

| Phospholipid class | Species       | wt/wt          | wt/SCA34       | SCA34/SCA34       |
|--------------------|---------------|----------------|----------------|-------------------|
| PC                 | PC 32:00      | 14.06 +/- 0.72 | 13.81 +/- 1.23 | 14.25 +/- 0.78    |
| PC                 | PC 32:01      | 2.53 +/- 0.15  | 2.1 +/- 0.16   | 2.23 +/- 0.37     |
| PC                 | PC 34:00      | 4.87 +/- 0.2   | 4.7 +/- 0.81   | 4.86 +/- 0.16     |
| PC                 | PC 34:01      | 16.68 +/- 0.59 | 17.18 +/- 0.75 | 18.1 +/- 1.05**** |
| PC                 | PC 34:02      | 2.23 +/- 0.2   | 2.04 +/- 0.18  | 2.08 +/- 0.11     |
| PC                 | PC 36:01      | 7.6 +/- 0.44   | 7.68 +/- 0.38  | 7.7 +/- 0.07      |
| PC                 | PC 36:02      | 2.05 +/- 0.1   | 2.06 +/- 0.03  | 2.04 +/- 0.2      |
| PC                 | PC 36:04      | 3.63 +/- 0.18  | 3.42 +/- 0.38  | 3.79 +/- 0.22     |
| PC                 | PC 38:04      | 5.02 +/- 0.1   | 4.91 +/- 0.17  | 5.34 +/- 0.38     |
| PC                 | PC 38:06      | 7.3 +/- 0.45   | 7.1 +/- 0.37   | 6.9 +/- 0.37      |
| PC                 | PC 40:06      | 18.5 +/- 0.42  | 19.12 +/- 0.45 | 18 +/- 0.54##     |
| PC                 | PC 40:07      | 1.78 +/- 0.15  | 1.63 +/- 0.05  | 1.45 +/- 0.03     |
| PC                 | PC 44:12      | 6.21 +/- 0.15  | 6.33 +/- 0.44  | 5.85 +/- 0.58     |
| PC VLC-PUFA        | PC 50:10      | 0.03 +/- 0.01  | 0.03 +/- 0.01  | 0.05 +/- 0.01     |
| PC VLC-PUFA        | PC 50:11      | 0.03 +/- 0.03  | 0.06 +/- 0.02  | 0.05 +/- 0.01     |
| PC VLC-PUFA        | PC 50:12      | 0.1 +/- 0.01   | 0.13 +/- 0.03  | 0.15 +/- 0.01     |
| PC VLC-PUFA        | PC 52:10      | 0.12 +/- 0.05  | 0.13 +/- 0.03  | 0.19 +/- 0.02     |
| PC VLC-PUFA        | PC 52:11      | 0.09 +/- 0.02  | 0.1 +/- 0.04   | 0.14 +/- 0.02     |
| PC VLC-PUFA        | PC 52:12      | 0.2 +/- 0.08   | 0.3 +/- 0.03   | 0.44 +/- 0.04     |
| PC VLC-PUFA        | PC 54:10      | 0.32 +/- 0.02  | 0.28 +/- 0.01  | 0.19 +/- 0.02     |
| PC VLC-PUFA        | PC 54:11      | 0.64 +/- 0.07  | 0.59 +/- 0.13  | 0.54 +/- 0.07     |
| PC VLC-PUFA        | PC 54:12      | 2.82 +/- 0.63  | 3.79 +/- 0.28* | 4.16 +/- 0.14***  |
| PC VLC-PUFA        | PC 56:10      | 0.12 +/- 0.02  | 0.09 +/- 0.03  | 0.04 +/- 0        |
| PC VLC-PUFA        | PC 56:11      | 0.53 +/- 0.18  | 0.41 +/- 0.13  | 0.17 +/- 0.03     |
| PC VLC-PUFA        | PC 56:12      | 2.3 +/- 0.46   | 1.85 +/- 0.13  | 1.17 +/- 0.25**   |
| PC VLC-PUFA        | PC 58:10      | 0 +/- 0.01     | 0.01 +/- 0.01  | 0 +/- 0           |
| PC VLC-PUFA        | PC 58:11      | 0.02 +/- 0     | 0.02 +/- 0.01  | 0.01 +/- 0.01     |
| PC VLC-PUFA        | PC 58:12      | 0.22 +/- 0.07  | 0.14 +/- 0.01  | 0.09 +/- 0.02     |
| PC VLC-PUFA        | Σ PC vlc-pufa | 7.54 +/- 0.61  | 7.92 +/- 0.51  | 7.4 +/- 0.38      |

Data shown as mean +/- standard deviation. Statistical analysis by 1-way ANOVA with Tukey's posthoc test.

\*, differs from wt/wt at level of  $p < 0.05$ .

\*\*, differs from wt/wt at level of  $p < 0.01$ .

\*\*\*, differs from wt/wt at level of  $p < 0.001$ .

\*\*\*\*, differs from wt/wt at level of  $p < 0.0001$ .

##, differs from wt/SCA34 at level of  $p < 0.01$ .
