# Supplementary material for: The Elovl4 Spinocerebellar Ataxia-34 Mutation 736T>G (p.W246G) Impairs Retinal Function in the Absence of Photoreceptor Degeneration
Source: PubMed Central journal article supplement (PMC7515967; doi:10.1007/s12035-020-02052-8), 2020-08-11
Supplement: 12035_2020_2052_MOESM10_ESM.pdf [file 12035_2020_2052_MOESM10_ESM.pdf]

**Supplemental Table 3. Polyunsaturated fatty acids in retinal phosphatidylserine (PS)**

| <b>Phospholipid class</b> | <b>Species</b> | <b>wt/wt</b>   | <b>wt/SCA34</b> | <b>SCA34/SCA34</b> |
|---------------------------|----------------|----------------|-----------------|--------------------|
| PS                        | PS 38:04       | 3.58 +/- 0.61  | 3.19 +/- 0.34   | 3.33 +/- 0.56      |
| PS                        | PS 40:04       | 4.05 +/- 0.16  | 4.25 +/- 0.87   | 4.66 +/- 0.87      |
| PS                        | PS 40:05       | 2.5 +/- 0.47   | 2.83 +/- 0.8    | 2.57 +/- 0.97      |
| PS                        | PS 40:06       | 53.91 +/- 0.47 | 53.37 +/- 4.85  | 53.56 +/- 3.64     |
| PS                        | PS 42:09       | 2.06 +/- 0.65  | 1.8 +/- 0.65    | 1.61 +/- 0.57      |
| PS                        | PS 44:10       | 3.2 +/- 0.08   | 3.42 +/- 1.29   | 3.22 +/- 0.27      |
| PS                        | PS 44:11       | 2.31 +/- 0.66  | 1.56 +/- 0.39   | 1.97 +/- 0.41      |
| PS                        | PS 44:12       | 18.67 +/- 1.05 | 18.73 +/- 0.93  | 17.3 +/- 3.06      |
| PS                        | PS 46:10       | 2.09 +/- 0.66  | 2.15 +/- 0.34   | 1.73 +/- 0.42      |
| PS                        | PS 46:11       | 1.88 +/- 0.31  | 2.28 +/- 0.82   | 3.21 +/- 0.71      |
| PS VLC-PUFA               | Σ PS vlc-pufa  | none detected  | none detected   | none detected      |

Data shown as mean +/- standard deviation. Statistical analysis by 1-way ANOVA with Tukey's posthoc test. No statistically significant differences detected.
