# Supplementary material for: The Elovl4 Spinocerebellar Ataxia-34 Mutation 736T>G (p.W246G) Impairs Retinal Function in the Absence of Photoreceptor Degeneration
Source: PubMed Central journal article supplement (PMC7515967; doi:10.1007/s12035-020-02052-8), 2020-08-11
Supplement: 12035_2020_2052_MOESM11_ESM.pdf [file 12035_2020_2052_MOESM11_ESM.pdf]

**Supplemental Table 4. Levels of key saturated fatty acids in the skin**

| <b>Species</b> | <b>Class</b>      | <b>wt/wt</b>  | <b>wt/SCA34</b>  | <b>SCA34/SCA34</b> |
|----------------|-------------------|---------------|------------------|--------------------|
| 24:0           | Precursor         | 8.38 +/- 1.26 | 10.01 +/- 1.17** | 10.8 +/- 0.99***   |
| 26:0           | VLC-SFA precursor | 1.73 +/- 0.12 | 1.84 +/- 0.18    | 1.97 +/- 0.20      |
| 28:0           | VLC-SFA           | 0.17 +/- 0.01 | 0.16 +/- 0.03    | 0.09 +/- 0.02*,#   |
| 30:0           | VLC-SFA           | 0.12 +/- 0.02 | 0.09 +/- 0.01    | *0.01 +/- 0.00*,#  |
| 28:0+30:0      | VLC-SFA           | 0.29 +/- 0.03 | 0.25 +/- 0.02    | *0.1 +/- 0.01*,#   |

Data shown as mean +/- standard deviation. Statistical analysis by 1-way ANOVA with Tukey's posthoc test.

\*, differs from wt/wt at level of  $p < 0.05$

\*\* , differs from wt/wt at level of  $p < 0.01$

\*\*\*, differs from wt/wt at level of  $p < 0.001$

#, differs from wt/SCA34 at level of  $p < 0.05$
